# Supplementary material
Source: Springer Nature journal article supplement (https://www.springermedizin.de/resource/supplementary/12885_2013_3963_MOESM6_ESM.pdf/9464888)

(A)

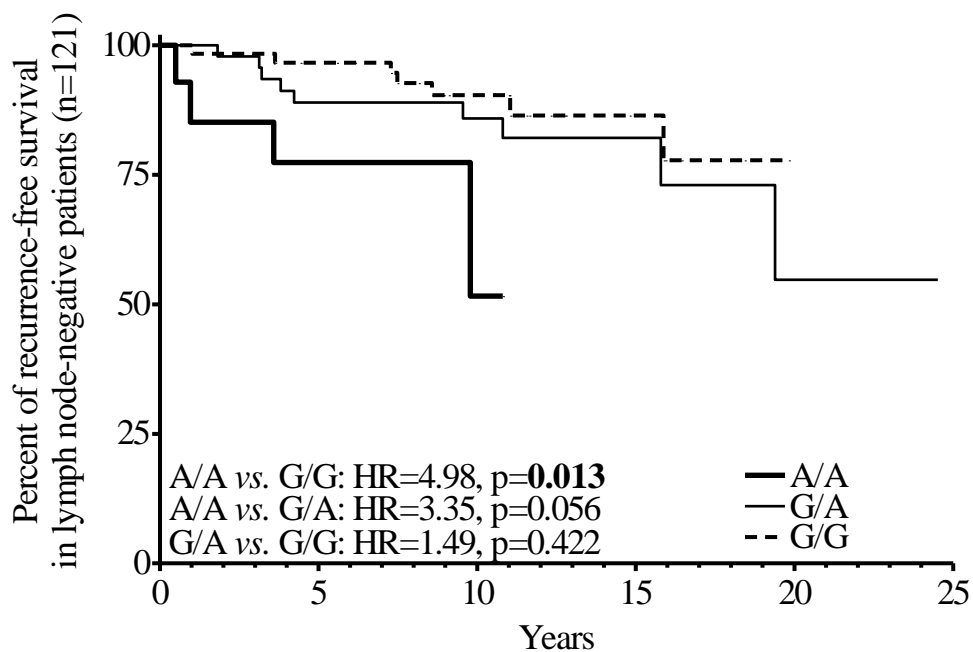

|             |     |     |    |    |   |
|-------------|-----|-----|----|----|---|
| Total entry | 121 | 103 | 57 | 19 | 3 |
| Events      | 10  | 5   | 2  | 3  | 0 |
| Withdrawn   | 8   | 41  | 36 | 13 | 3 |

(B)

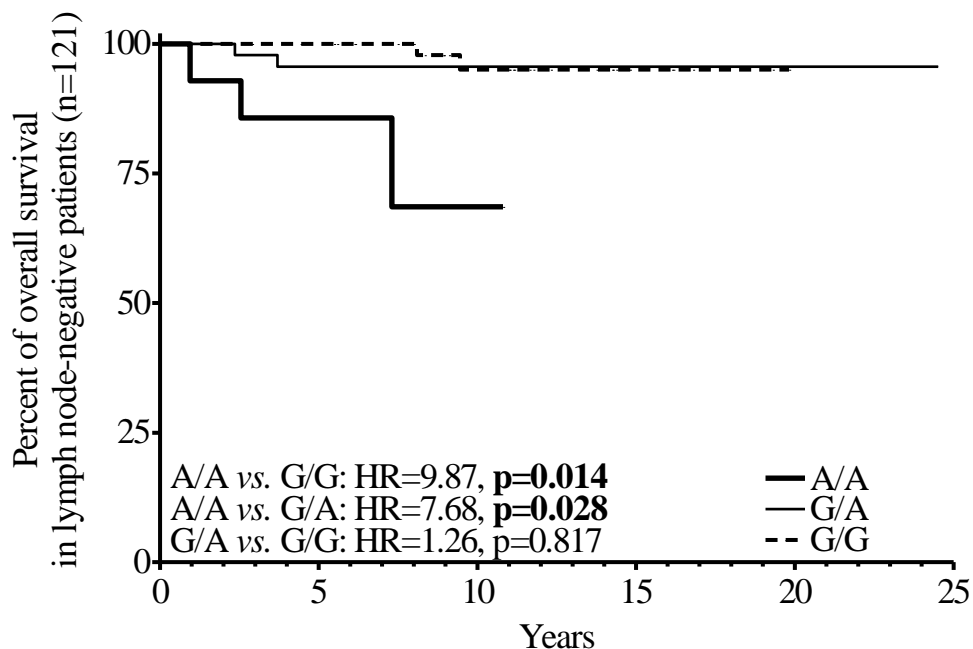

|             |     |     |    |    |   |
|-------------|-----|-----|----|----|---|
| Total entry | 121 | 109 | 63 | 22 | 4 |
| Events      | 4   | 3   | 0  | 0  | 0 |
| Withdrawn   | 8   | 43  | 41 | 18 | 4 |

Supplement: MOESM6 [file 9464888]
